# Supplementary material for: Evaluation of γ-oryzanol Accumulation and Lipid Metabolism in the Body of Mice Following Long-Term Administration of γ-oryzanol
Source: PubMed Central journal article supplement (PMC6356301; doi:10.3390/nu11010104), 2019-01-06
Supplement: nutrients-11-00104-s001.pdf [file nutrients-11-00104-s001.pdf]

**Supplementary Table 1**

Analytical conditions for HPLC-MS/MS analysis.

| $\gamma$ -Oryzanol                       | Cycloartenyl ferulate | 24-Methylenecycloartenyl ferulate and its isomers | Campesteryl ferulate | $\beta$ -Sitosteryl ferulate | Ferulic acid |
|------------------------------------------|-----------------------|---------------------------------------------------|----------------------|------------------------------|--------------|
| Precursor ion (m/z) [M - H] <sup>-</sup> | 601.5                 | 615.5                                             | 575.5                | 589.5                        | 192.9        |
| Product ion (m/z)                        | 586.3                 | 600.3                                             | 560.3                | 574.3                        | 133.8        |
| Source                                   | ESI                   | ESI                                               | ESI                  | ESI                          | ESI          |
| Ion polarity                             | Negative              | Negative                                          | Negative             | Negative                     | Negative     |
| Declustering potential (V)               | -145.0                | -145.0                                            | -175.0               | -155.0                       | -70.0        |
| Entrance potential (V)                   | -10.0                 | -10.0                                             | -10.0                | -10.0                        | -10.0        |
| Collision energy (V)                     | -56.0                 | -58.0                                             | -50.0                | -52.0                        | -22.0        |
| Collision cell exit potential (V)        | -27.0                 | -29.0                                             | -23.0                | -31.0                        | -4.0         |
| Curtain gas (psi)                        | 20.0                  | 20.0                                              | 20.0                 | 20.0                         | 30.0         |
| Collision gas (psi)                      | 4                     | 4                                                 | 4                    | 4                            | 6            |
| Ion spray voltage (V)                    | -4500.0               | -4500.0                                           | -4500.0              | -4500.0                      | -4500.0      |
| Temperature (°C)                         | 600.0                 | 600.0                                             | 600.0                | 600.0                        | 600.0        |
| Ion source gas 1 (psi)                   | 50.0                  | 50.0                                              | 50.0                 | 50.0                         | 80.0         |
| Ion source gas 2 (psi)                   | 60.0                  | 60.0                                              | 60.0                 | 60.0                         | 70.0         |

ESI: electrospray ionization.
